# Supplementary material for: Room-temperature sub-100 nm Néel-type skyrmions in non-stoichiometric van der Waals ferromagnet Fe3-xGaTe2 with ultrafast laser writability
Source: Springer Nature journal article supplement (doi:10.1038/s41467-024-45310-2), 2024-02-03
Supplement: 41467_2024_45310_MOESM3_ESM.pdf [file 41467_2024_45310_MOESM3_ESM.pdf]

## Description of Additional Supplementary Files

**Supplementary Movie 1:** Movie for detailed micromagnetic simulation on skyrmions' laser writing process.
